# Supplementary material for: Tunable electroluminescence from an n-ZnO/p-GaN heterojunction with a CsPbBr3 interlayer grown by pulsed laser deposition
Source: Royal Society of Chemistry journal article supplement (doi:10.1039/d0tc02807j), 2020-01-01
Supplement: d0tc02807j1.pdf [file d0tc02807j1.pdf]

## **Tunable electroluminescence from n-ZnO/p-GaN heterojunction with CsPbBr<sub>3</sub> interlayer grown by Pulse-Laser Deposition**

*Yu Huang<sup>1‡</sup>, Xiaoyu Zhou<sup>1‡</sup>, Lichun Zhang<sup>\*1</sup>, Guochen Lin<sup>2</sup>, Man Xu<sup>1</sup>, Yuan Zhao<sup>1</sup>,  
Mengmeng Jiao<sup>1</sup>, Dengying Zhang<sup>1</sup>, Bingying Pan<sup>1</sup>, Linwei Zhu<sup>1</sup>, Fengzhou Zhao<sup>\*1</sup>*

*<sup>1</sup>School of Physics and Optoelectronic Engineering, Ludong University, Yantai, 264025,  
China*

*<sup>2</sup>College of Life and Environmental Sciences, Minzu University of China, Beijing, 100081,  
china*

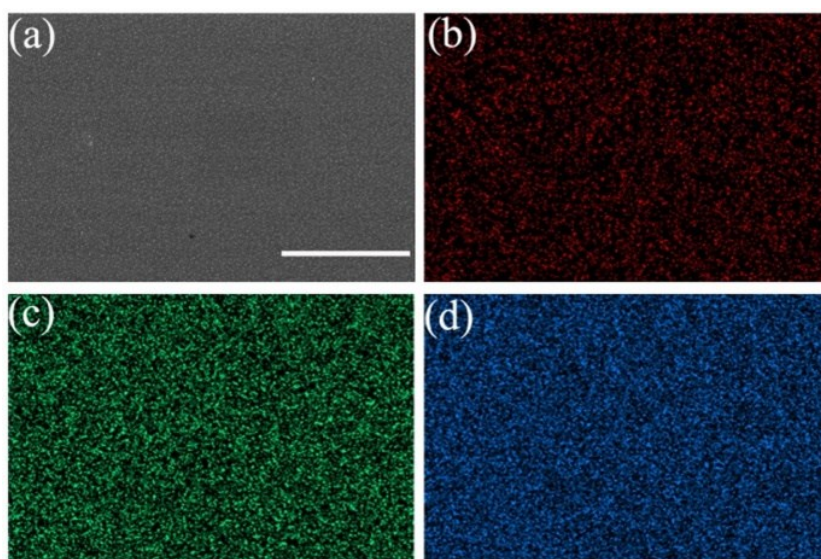

Figure. S1. EDS mapping of the CsPbBr<sub>3</sub> thin film (a) surface, (b) Cs, (c) Pb (d) Br, and. Scale bars in SEM images are 25  $\mu\text{m}$ .

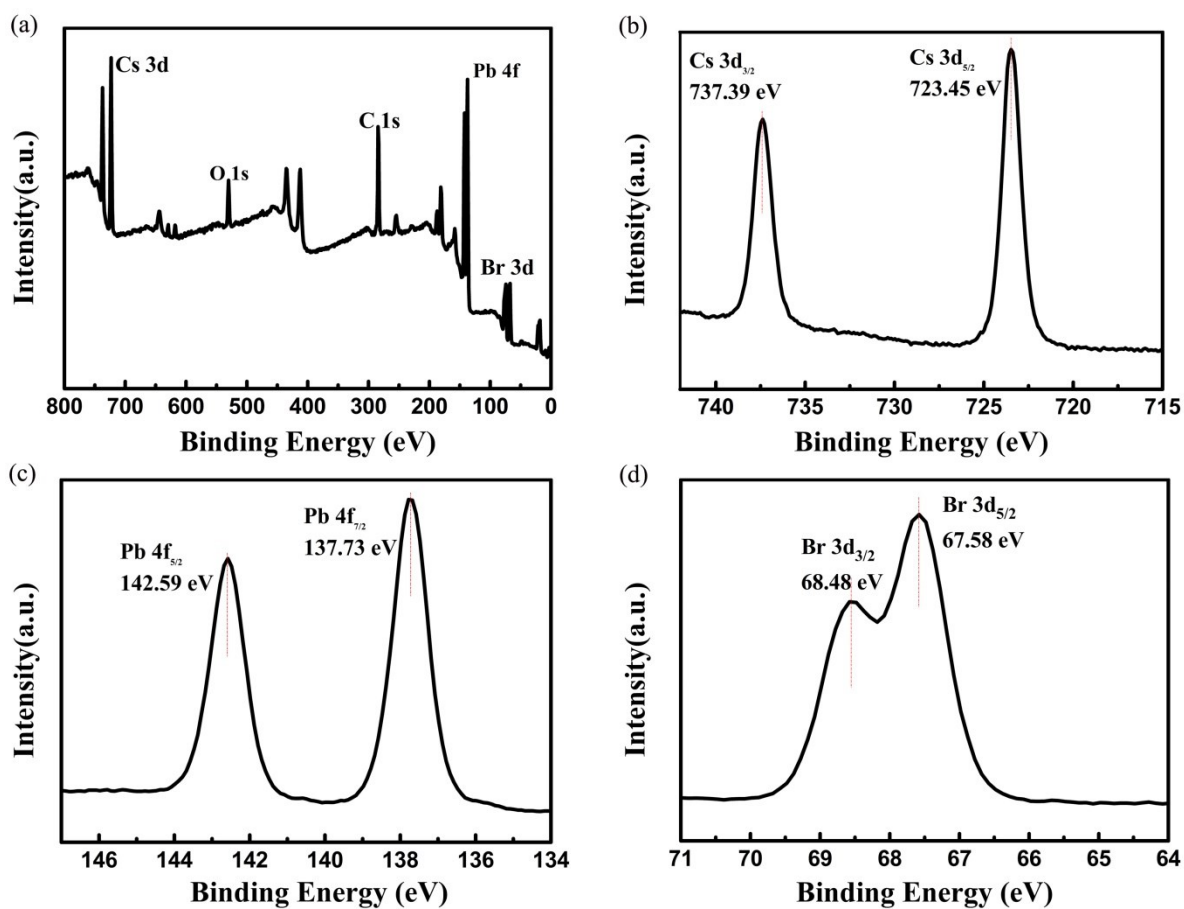

Figure S2: XPS spectra of the CsPbBr<sub>3</sub> thin film: (a) total spectrum (b) Cs 3d (c) Pb 4f (d) Br 3d. X-ray photoelectron spectroscopy (XPS) was employed to qualitatively analyze the chemical state and structural properties. Because of adventitious carbon is so ubiquitous, its C 1s peak position is often used as a reference and is assumed to be 284.6 eV.<sup>1,2</sup> And the binding energy profile is smoothed using the mode of Wiener Filter.

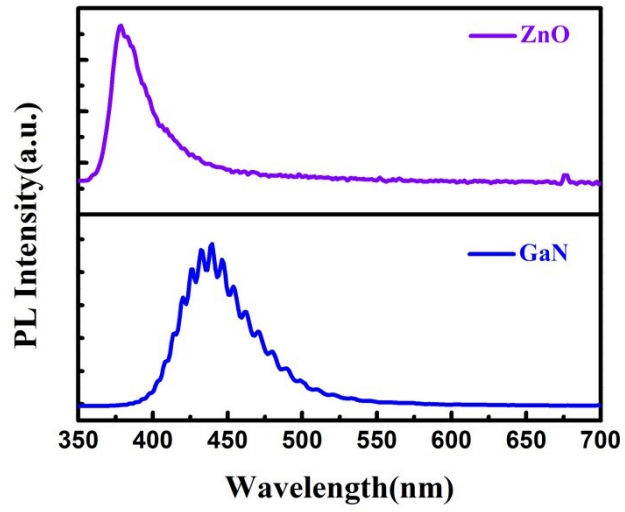

Figure S3. PL spectra of the ZnO film, GaN substrate

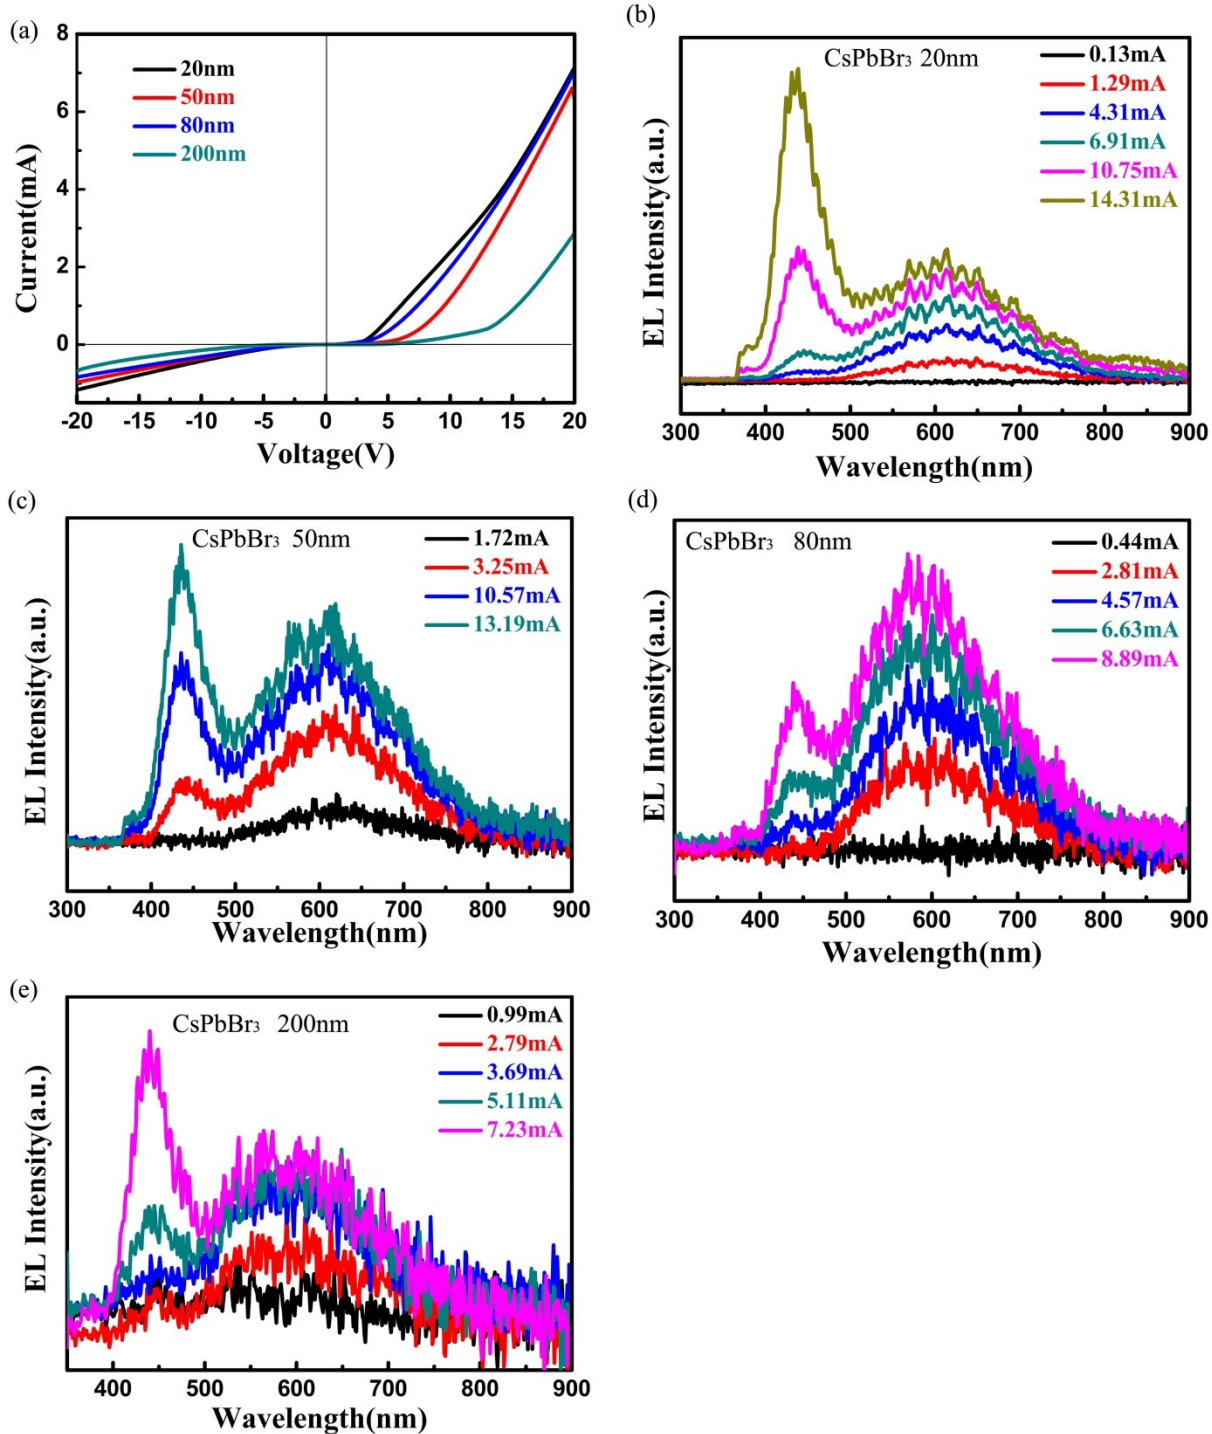

**Figure S4.** (a) I-V curves of the n-ZnO/i-CsPbBr<sub>3</sub>/p-GaN heterojunction LED, EL spectrum of the n-ZnO/i-CsPbBr<sub>3</sub>/p-GaN heterojunction LED with different CsPbBr<sub>3</sub> film thickness (b) 20 nm, (c) 50 nm, (d) 80 nm, (e) 100 nm.

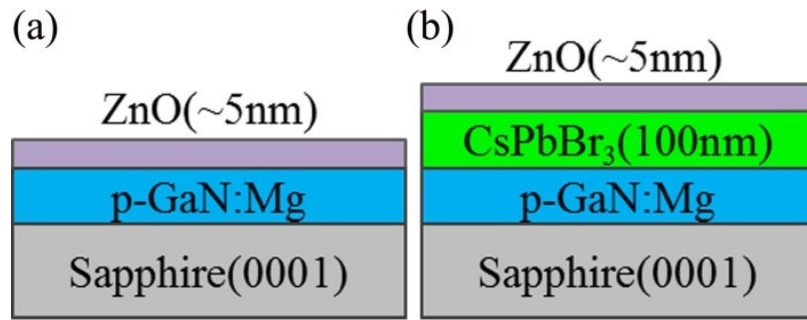

**Figure S5.** Samples (a)-(b) are prepared for measuring the oxygen vacancy of ZnO film: (a) ZnO/GaN, (c) ZnO/CsPbBr<sub>3</sub>/GaN

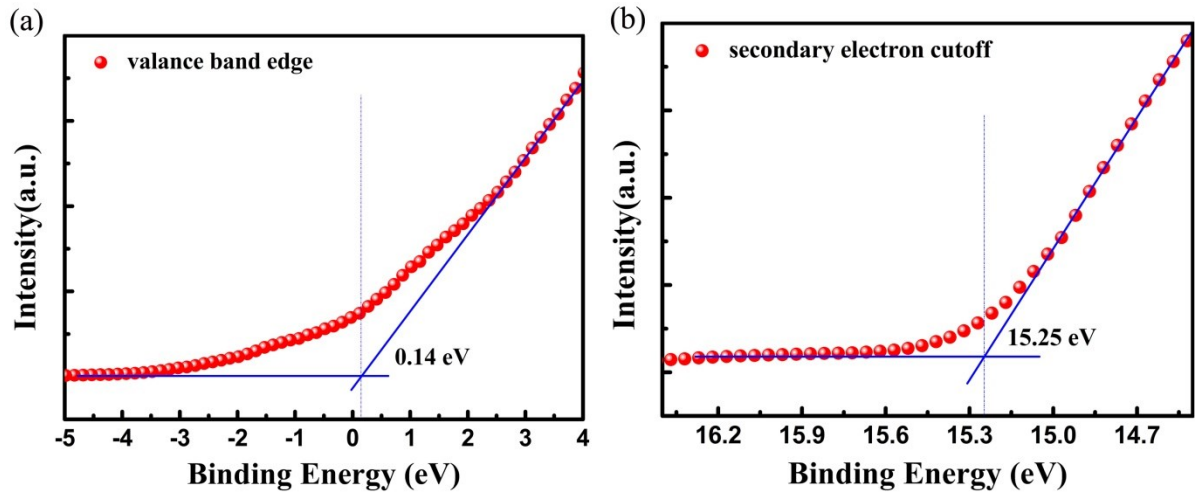

**Figure S6.** UPS spectra of CsPbBr<sub>3</sub> thin films, (a) Valence band edge, (b) secondary electron cutoff.

The valence band maximum (VBM) is estimated according to equation<sup>3-6</sup>:

$$E_V = h\nu + E_{cutoff} - E_{Feimi}$$

where  $h\nu$  is the ultraviolet radiation energy (21.2 eV). Figure S6 shows the  $E_{cutoff}$  and  $E_{Feimi}$  are 0.14 eV, and 15.25 eV, respectively. Thus, the  $E_V$  of CsPbBr<sub>3</sub> is calculated to be 6.09 eV. Combined with the absorbance spectrum of the CsPbBr<sub>3</sub> (Figure 2c), the  $E_g$  is measured to be 2.33 eV. Finally, the  $E_C$  of the CsPbBr<sub>3</sub> is estimated to be 3.76 eV

**Table S1. The high-resolution XPS spectra of the elements Cs, Pb, and Br by different prepared method.**

| Method (film)                      | Cs 3d <sub>5/2</sub><br>(eV) | Cs 3d <sub>3/2</sub><br>(eV) | Pb 4f <sub>7/2</sub><br>(eV) | Pb 4f <sub>5/2</sub><br>(eV) | Br 3d <sub>5/2</sub><br>(eV) | Br 3d <sub>3/2</sub><br>(eV) | Ref.         |
|------------------------------------|------------------------------|------------------------------|------------------------------|------------------------------|------------------------------|------------------------------|--------------|
| Solution-processed                 | 724.55                       | 738.54                       | 138.56                       | 143.44                       | 68.52                        | 69.85                        | 7            |
| Evaporated                         | 724.70                       | 738.68                       | 138.66                       | 143.56                       | 68.60                        | 69.95                        | 7            |
| Chemical Vapor deposition<br>(CVD) | \                            | \                            | 135.00                       | 139.80                       | 65.00                        | 66.00                        | 8            |
| Pulse laser deposition<br>(PLD)    | 723.45                       | 737.39                       | 137.73                       | 142.59                       | 67.58                        | 68.48                        | This<br>work |



**Table S2. Color coordinates of the ZnO/GaN heterojunction LED and ZnO/CsPbBr<sub>3</sub>/GaN heterojunction LED**

|                                     |         |         |         |         |         |         |
|-------------------------------------|---------|---------|---------|---------|---------|---------|
| ZnO/GaN<br>LED                      | 3.91 mA | 6.22 mA | 9.89 mA | 13.5 mA | 17.1 mA | /       |
| CIE X                               | 0.3453  | 0.2920  | 0.2541  | 0.2396  | 0.2355  | /       |
| CIE Y                               | 0.2889  | 0.2296  | 0.1814  | 0.1675  | 0.1629  | /       |
| ZnO/CsPbBr <sub>3</sub> /GaN<br>LED | 0.77mA  | 2.11 mA | 5.81 mA | 10.1 mA | 14.8 mA | 20.1 mA |
| CIE X                               | 0.4250  | 0.4647  | 0.4691  | 0.4554  | 0.4429  | 0.4356  |
| CIE Y                               | 0.4228  | 0.4553  | 0.4671  | 0.4658  | 0.4518  | 0.4511  |

## REFERENCES

1. J. Endres, M. Kulbak, L. Zhao, B. P. Rand, D. Cahen, G. Hodes and A. Kahn, *J. Appl. Phys.*, 2017, **121**, 035304.
2. T. Pang, R. Jia, Y. Wang, K. Sun, Z. Hu, Y. Zhu, S. Luan and Y. Zhang, *J. Mater. Chem. C*, 2019, **7**, 609-616.
3. A. Subramanian, Z. Pan, Z. Zhang, I. Ahmad, J. Chen, M. Liu, S. Cheng, Y. Xu, J. Wu, W. Lei, Q. Khan and Y. Zhang, *ACS Appl. Mater. Interfaces*, 2018, **10**, 13236-13243.
4. G. Cen, Y. Liu, C. Zhao, G. Wang, Y. Fu, G. Yan, Y. Yuan, C. Su, Z. Zhao and W. Mai, *Small*, 2019, **15**, 1902135.
5. J. Yun, H. Fan, Y. Zhang, R. Huang, Y. Ren, M. Guo, H. An, P. Kang and H. Guo, *ACS Appl. Mater. Interfaces*, 2020, **12**, 3086-3095.
6. Y. Shen, C. Wei, L. Ma, S. Wang, X. Wang, X. Xu and H. Zeng, *J. Mater. Chem. C*, 2018, **6**, 12164-12169.
7. X. Liu, Z. Liu, J. Li, X. Tan, B. Sun, H. Fang, S. Xi, T. Shi, Z. Tang and G. Liao, *J. Mater. Chem. C*, 2020, **8**, 3337-3350.
8. Y. Li, Z. Shi, L. Lei, F. Zhang, Z. Ma, D. Wu, T. Xu, Y. Tian, Y. Zhang, G. Du, C. Shan and X. Li, *Chem. Mater.*, 2018, **30**, 6744-6755.
